# Supplementary material
Source: HighWire-hosted journal article supplement (https://www.annfammed.org/highwire/filestream/8547/field_highwire_adjunct_files/0/Bazemore_Supp_Apps_.pdf)
Supplement: Bazemore_Supp_Apps_.pdf [file Bazemore_Supp_Apps_.pdf]

## Supplementary material for:

Bazemore A, Petterson S, Peterson LE, Phillips RL. More comprehensive care among family physicians is associated with lower costs and fewer hospitalizations. *Ann Fam Med*. 2015;13(3):206-213.

Appendix 1. Regression Analyses examining Association between Comprehensiveness and Measures of Hospitalization and Expenses

|                        | Hospitalization<br>OR | ln(Part A and<br>B)<br>$\beta$ | ln(Part B)<br>$\beta$ |
|------------------------|-----------------------|--------------------------------|-----------------------|
| Comprehensiveness      |                       |                                |                       |
| 0-1                    | Reference             | Reference                      | Reference             |
| 2-3                    | 1.061<br>(0.86)       | -0.024<br>(0.68)               | -0.050<br>(1.50)      |
| 4                      | 1.022<br>(0.27)       | -0.069<br>(1.73)               | -0.102<br>(2.35)*     |
| 5-6                    | 0.991<br>(0.14)       | -0.073<br>(1.96)*              | -0.092<br>(2.41)*     |
| 7+                     | 0.999<br>(0.02)       | -0.103<br>(2.54)*              | -0.128<br>(2.93)**    |
| Weighted Charlson Sum  | 1.485<br>(52.84)**    | 0.362<br>(63.78)**             | 0.278<br>(65.69)**    |
| Female                 | 1.045<br>(2.25)*      | 0.081<br>(7.62)**              | 0.070<br>(7.68)**     |
| Race/Ethnicity         |                       |                                |                       |
| White                  | Reference             | Reference                      | Reference             |
| Black                  | 1.037<br>(0.57)       | -0.185<br>(4.74)**             | -0.218<br>(6.77)**    |
| Hispanic               | 0.658<br>(3.71)**     | -0.209<br>(3.55)**             | -0.137<br>(1.98)*     |
| Other Race             | 0.645<br>(1.89)       | -0.143<br>(3.18)**             | -0.091<br>(1.25)      |
| Age                    | 1.041<br>(29.56)**    | 0.015<br>(16.14)**             | 0.004<br>(5.70)**     |
| PC visits              | 1.058<br>(12.70)**    | 0.081<br>(20.61)**             | 0.072<br>(21.93)**    |
| Rural-Urban Location   |                       |                                |                       |
| Urban                  | Reference             | Reference                      | Reference             |
| Large Rural            | 1.037<br>(0.69)       | -0.172<br>(5.51)**             | -0.201<br>(6.61)**    |
| Small Rural            | 1.037<br>(0.56)       | -0.215<br>(4.41)**             | -0.243<br>(4.89)**    |
| Isolated Rural         | 1.229<br>(3.31)**     | -0.075<br>(1.22)               | -0.146<br>(2.09)*     |
| Frontier               | 1.188<br>(1.40)       | -0.296<br>(6.29)**             | -0.398<br>(6.14)**    |
| Years since Graduation | 1.001<br>(0.28)       | -0.001<br>(0.86)               | -0.002<br>(1.40)      |
| IMG                    | 0.954<br>(0.49)       | 0.018<br>(0.38)                | 0.028<br>(0.63)       |
| Patients (#)           | 1.000                 | 0.000                          | 0.000                 |

|                    |          |           |           |
|--------------------|----------|-----------|-----------|
|                    | (0.09)   | (5.14)**  | (5.84)**  |
| Female Physicians  | 1.048    | 0.014     | -0.001    |
|                    | (0.84)   | (0.43)    | (0.02)    |
| % Care in Hospital | 2.303    | 0.189     | -0.001    |
|                    | (5.52)** | (1.64)    | (0.01)    |
| Constant           |          | 5.607     | 6.407     |
|                    |          | (66.66)** | (95.47)** |

2011 Medicare Claims data. OR: Odds Ratio, IMG, International Medical Students. The sample consists of 178,956 patients receiving the plurality of their care from 1,095 FPs who recertified between 2007 and 2011.

Physicians

Appendix 2. Regression Analyses examining Association between BETOS scores and Measures of Hospitalization and Expenses

|                             | Hospitalization    | ln(Part A and B)    | ln(Part B)          |
|-----------------------------|--------------------|---------------------|---------------------|
|                             | OR                 | $\beta$             | $\beta$             |
| <b>BETOS Score</b>          |                    |                     |                     |
| 1-12                        | Reference          | Reference           | Reference           |
| 13-14                       | 0.782<br>(5.07)**  | -0.134<br>(4.05)**  | -0.052<br>(1.77)    |
| 15-16                       | 0.751<br>(5.28)**  | -0.137<br>(3.82)**  | -0.058<br>(1.81)    |
| 17-19                       | 0.690<br>(6.63)**  | -0.201<br>(5.58)**  | -0.102<br>(3.16)**  |
| 20-32                       | 0.655<br>(8.14)**  | -0.255<br>(6.60)**  | -0.144<br>(4.15)**  |
| Weighted Charlson Sum       | 1.482<br>(95.65)** | 0.371<br>(115.99)** | 0.286<br>(118.21)** |
| Female                      | 1.028<br>(2.55)*   | 0.063<br>(9.32)**   | 0.059<br>(9.41)**   |
| <b>Race/Ethnicity</b>       |                    |                     |                     |
| White                       | Reference          | Reference           | Reference           |
| Black                       | 0.952<br>(1.45)    | -0.268<br>(8.76)**  | -0.289<br>(11.47)** |
| Hispanic                    | 0.705<br>(6.31)**  | -0.323<br>(9.43)**  | -0.262<br>(7.17)**  |
| Other Race                  | 0.701<br>(4.13)**  | -0.260<br>(8.08)**  | -0.216<br>(5.66)**  |
| Age                         | 1.042<br>(51.29)** | 0.017<br>(28.87)**  | 0.005<br>(11.14)**  |
| PC visits                   | 1.059<br>(24.85)** | 0.081<br>(40.45)**  | 0.072<br>(41.00)**  |
| <b>Rural-Urban Location</b> |                    |                     |                     |
| Urban                       | Reference          | Reference           | Reference           |
| Large Rural                 | 1.172<br>(4.03)**  | -0.090<br>(3.54)**  | -0.138<br>(5.70)**  |
| Small Rural                 | 1.285              | -0.171              | -0.246              |

|                        |          |           |            |
|------------------------|----------|-----------|------------|
|                        | (5.56)** | (4.08)**  | (6.48)**   |
| Isolated Rural         | 1.244    | -0.166    | -0.243     |
|                        | (3.29)** | (4.20)**  | (6.15)**   |
| Frontier               | 1.159    | -0.227    | -0.291     |
|                        | (2.17)*  | (5.71)**  | (7.57)**   |
| Years since Graduation | 0.994    | -0.003    | -0.002     |
|                        | (3.79)** | (3.07)**  | (2.23)*    |
| IMG                    | 0.992    | 0.026     | 0.033      |
|                        | (0.15)   | (0.74)    | (1.12)     |
| Patients (#)           | 1.000    | 0.000     | 0.000      |
|                        | (1.84)   | (3.76)**  | (4.26)**   |
| Female Physicians      | 0.932    | -0.009    | 0.004      |
|                        | (2.04)*  | (0.41)    | (0.20)     |
| % Care in Hospital     | 2.517    | 0.326     | 0.061      |
|                        | (8.86)** | (3.39)**  | (0.89)     |
|                        |          | 5.601     | 6.294      |
| Constant               |          | (97.30)** | (122.39)** |

---

2011 Medicare Claims data. OR: Odds Ratio, IMG, International Medical Students. The sample consists of 556,306 patients receiving the plurality of their care from 3,360 FPs.
